# Supplementary material for: Covalent organic framework-loaded silver nanoparticles as robust mimetic oxidase for highly sensitive and selective colorimetric detection of mercury in blood
Source: Royal Society of Chemistry journal article supplement (doi:10.1039/d2tb01887j), 2022-01-01
Supplement: d2tb01887j1.pdf [file d2tb01887j1.pdf]

## Electronic Supplementary Information

### Covalent organic frameworks loaded silver nanoparticles as robust mimetic oxidase for highly sensitive and selective colorimetric detection of mercury in blood

Qingqing Liu,<sup>a,b</sup> Chenchen Xu,<sup>b</sup> Su Chu,<sup>b</sup> Shuai Li,<sup>a</sup> Fengxiang Wang,<sup>b</sup> Yanmei Si,<sup>c</sup> Guojiang Mao,<sup>d</sup> Choufei Wu,<sup>a</sup> and Hua Wang \*<sup>a,b</sup>

<sup>a</sup> Huzhou Key Laboratory of Medical and Environmental Applications Technologies, School of Life Sciences, Huzhou University, Huzhou City, Zhejiang Province 313000, P.R. China.

<sup>b</sup> College of Chemistry and Chemical Engineering, Qufu Normal University, Qufu, Shandong 273165, P.R. China.

<sup>c</sup> College of Environmental and Chemical Engineering, Nanchang Hangkong University, Nanchang, 330063, P.R. China.

<sup>d</sup> Henan Key Laboratory of Organic Functional Molecule and Drug Innovation, School of Chemistry and Chemical Engineering, Henan Normal University, Xinxiang, Henan, 453007, P. R. China.

\* Corresponding Author: E-mail address: Wanghua@zjhu.edu.cn; Tel: +86 5722321095

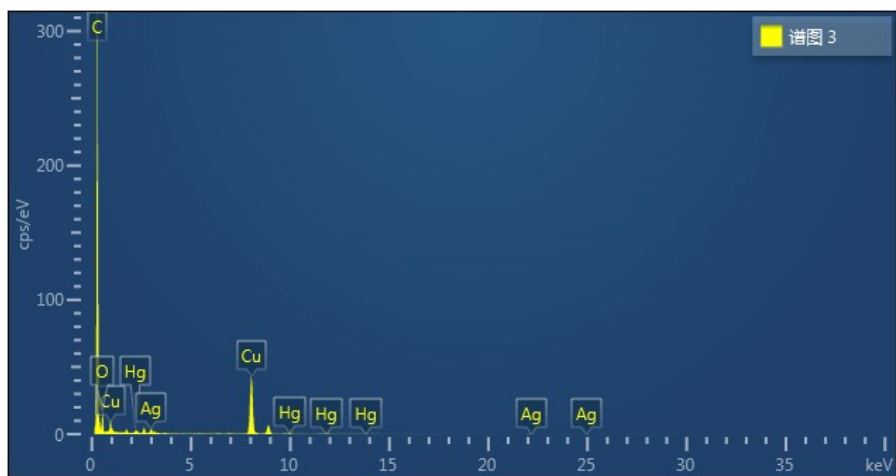

**Fig. S1.** EDS spectra of elemental analysis of COF-Ag nanozymes with  $\text{Hg}^{2+}$  ions.

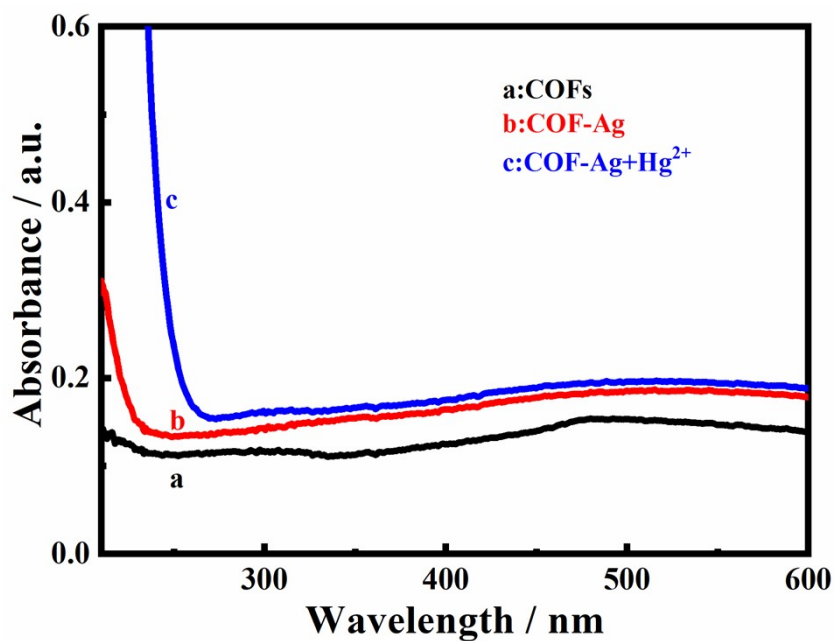

**Fig. S2.** UV-vis spectra of (a) COFs, (b) COF-Ag nanozymes, and (c) COF-Ag nanozymes with  $\text{Hg}^{2+}$  ions.

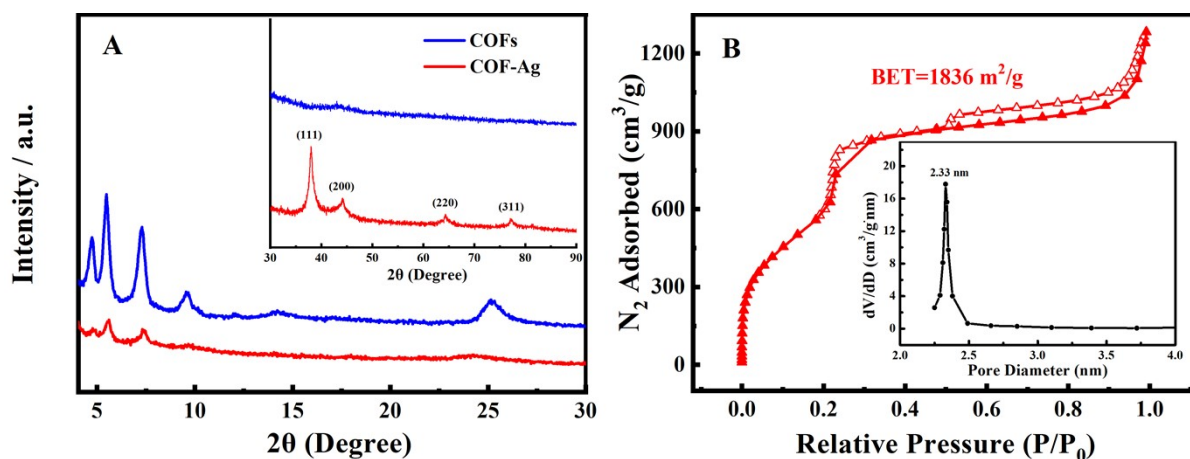

**Fig. S3.** (A) XRD spectra of COFs and COF-Ag nanozymes; (B) N<sub>2</sub> adsorption-desorption isotherms of COFs with the inset of pore distribution curve.

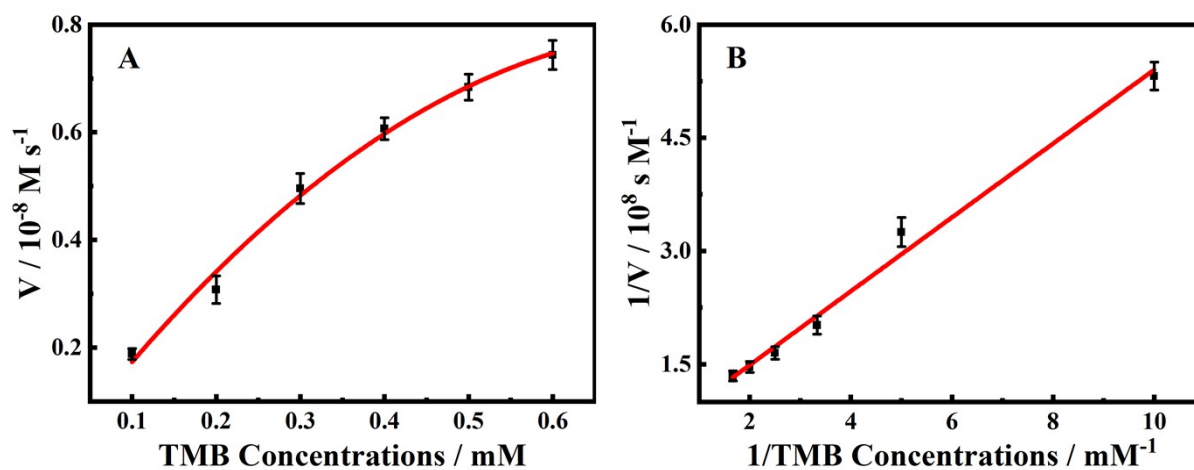

**Fig. S4.** (A) Steady-state kinetic assays for different TMB concentrations of COFs in the presence of Hg<sup>2+</sup> ions, with (B) the corresponding double-reciprocal (Lineweaver-Burk) plotting.

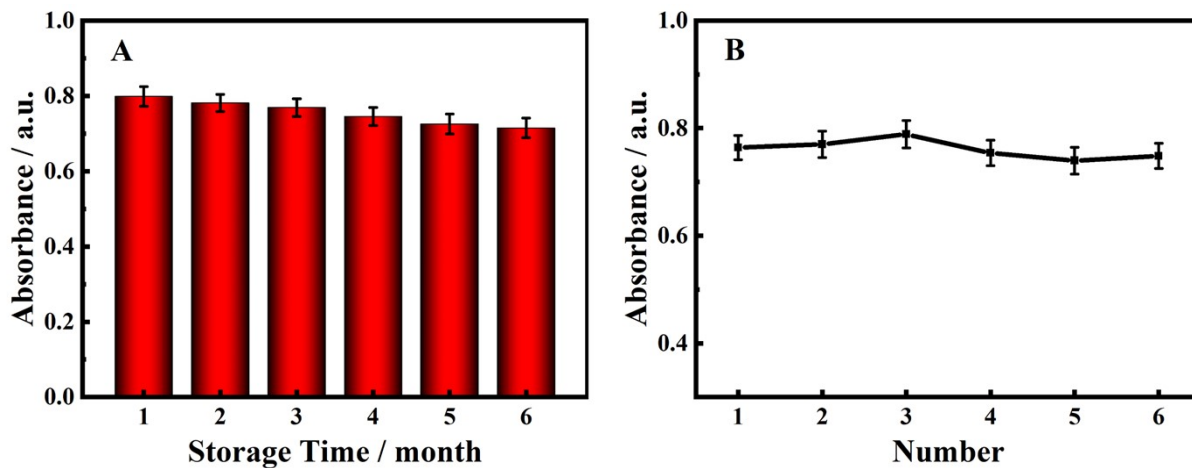

**Fig. S5.** (A) Storage stability of COF-Ag nanozymes stored in the dark for different time intervals for  $\text{Hg}^{2+}$  ions detection; (B) the reproducibility of colorimetric analysis for  $\text{Hg}^{2+}$  ions based on COF-Ag nanozymes.

**Table. S1.** Comparable results of the kinetic parameters of COF-Ag nanozymes with and without Hg<sup>2+</sup> ions, and COFs with Hg<sup>2+</sup> ions ( $K_m$  is the Michaelis-Menten constant, and  $V_{max}$  is the maximal reaction velocity).

|                              | <b>Substrate</b> | <b><math>K_m</math> (mM)</b> | <b><math>V_{max}</math> (<math>10^{-9}</math> M s<sup>-1</sup>)</b> |
|------------------------------|------------------|------------------------------|---------------------------------------------------------------------|
| COF-Ag                       | TMB              | 2.91                         | 3.69                                                                |
| COF-Ag with Hg <sup>2+</sup> | TMB              | 0.324                        | 51.02                                                               |
| COFs with Hg <sup>2+</sup>   | TMB              | 0.962                        | 19.64                                                               |

**Table. S2.** Results of recovery tests by the developed colorimetric method for the analysis of Hg<sup>2+</sup> ions spiked in blood samples.

| <b>Samples</b>      | <b>1</b>          | <b>2</b>        | <b>3</b>        | <b>4</b>        | <b>5</b>        |
|---------------------|-------------------|-----------------|-----------------|-----------------|-----------------|
| Added ( $\mu$ M)    | 0.05              | 0.20            | 0.80            | 2.0             | 4.0             |
| Detected ( $\mu$ M) | 0.054 $\pm$ 0.008 | 0.21 $\pm$ 0.02 | 0.78 $\pm$ 0.02 | 2.04 $\pm$ 0.16 | 3.93 $\pm$ 0.13 |
| Recovery (%)        | 108.0             | 105.0           | 97.5            | 102.0           | 98.3            |

**Table. S3.** Comparison of the analytical performances for Hg<sup>2+</sup> ions among different colorimetric methods based on enzyme catalysis

| Colorimetric methods with different nanozymes | Linear ranges ( $\mu\text{M}$ ) | LODs ( $\mu\text{M}$ ) | References |
|-----------------------------------------------|---------------------------------|------------------------|------------|
| Ag <sub>2</sub> S@GO                          | 0.05-1.2                        | 0.0098                 | 1          |
| Cit-AgNPs                                     | 0.1-10                          | 0.028                  | 2          |
| Ag <sub>3</sub> PO <sub>4</sub>               | 0.1-7.0                         | 0.020                  | 3          |
| Au/WO <sub>3</sub> HNFs                       | 0-180                           | 0.078                  | 4          |
| CoS                                           | 0.25-3.0                        | 0.1                    | 5          |
| Au@NH <sub>2</sub> -MIL-125(Ti)               | 1-5                             | 0.1                    | 6          |
| COF-Ag                                        | 0.05-10.0                       | 0.0037                 | This work  |

## References

- 1 Q. Zhao, W. Gou, X. Zhang, M. Zhang, Y. Bu, L. Wang, L. Hu, W. Yao and Z. Yan, *Appl. Surf. Sci.*, 2021, **545**, 148973.
- 2 G. Wang, X. Xu, L. Cao, C. He, Z. Li and C. Zhang, *RSC Adv.*, 2014, **4**, 5867.
- 3 Y. Zhang, P. Ju, L. Sun, Z. Wang, X. Zhai, F. Jiang and C. Sun, *Microchim. Acta*, 2020, **187**, 422.
- 4 L. Zhi, S. Zhang, M. Li, J. Tu and X. Lu, *ACS Appl. Mater. Interfaces*, 2022, **14**, 9442-9453.
- 5 H. Yang, J. Zha, P. Zhang, Y. Xiong, L. Su and F. Ye, *RSC Adv.*, 2016, **6**, 66963-66970.
- 6 Y. Zhang, J. Song, Q. Pan, X. Zhang, W. Shao, X. Zhang, C. Quan and J. Li, *J. Mater. Chem. B*, 2020, **8**, 114-124.
